# Supplementary material for: Carvacrol, Thymol, and Garlic Essential Oil Promote Skin Innate Immunity in Gilthead Seabream (Sparus aurata) Through the Multifactorial Modulation of the Secretory Pathway and Enhancement of Mucus Protective Capacity
Source: Front Immunol. 2021 Mar 12;12:633621. doi: 10.3389/fimmu.2021.633621 (PMC7994269; doi:10.3389/fimmu.2021.633621)
Supplement: Supplementary file 1 [file Table_1.XLSX]

## Sheet: Ms Info
Title of the manuscript:	Carvacrol, thymol and garlic essential oil promote skin innate immunity in gilthead seabream (Sparus aurata) juveniles through the multifactorial modulation of the secretory pathway and enhancement of mucus protective capacity
Author list:	Joana P. Firmino, Laura Fernández-Alacid, Eva Vallejos-Vidal, Ricardo Salomón, Ignasi Sanahuja, Lluis Tort, Antoni Ibarz, Felipe E. Reyes-López, Enric Gisbert

## Sheet: Supp. Table 1
Supplementary Table 1 – Summary of the differentially expressed genes (DEGs) obtained from the microarray-based transcriptomic analysis for the skin of juvenile gilthead seabream fed the garlic essential oil, carvacrol and thymol supplemented diet. Table lists the DEGs descriptions and their corresponding acronyms, Fold Change (FC), gene regulation (up or down), and P-value. N/A defines the gene …
Gene description	Gene Acronym	FC	Regulation	P-value
Unknown gene	n/a	1.6583	up	0.0474071
Unknown gene	n/a	1.55466	up	0.0309255
ABI Family Member 3 Binding Protein	abi3bp	1.5047	up	0.0349302
Major Histocompatibility Complex, Class II, Alpha	mhc-iia	1.49295	up	0.0289809
Unknown gene	n/a	1.48532	up	0.0247112
Unknown gene	n/a	1.45181	up	0.0385443
Tubulin Tyrosine Ligase Like 7	ttll7	1.42604	up	0.0361992
Forkhead Box F2	foxf2	1.42177	up	0.00689822
Extracellular Matrix Protein 2	ecm2	1.41979	up	0.0393856
Rho Family GTPase 2	rnd2	1.41684	up	0.00919534
Family With Sequence Similarity 214 Member A	fam214a	1.41162	up	0.0286826
Unknown gene	n/a	1.40704	up	0.046544
Unknown gene	n/a	1.39504	up	0.00420297
STEAP4 Metalloreductase	steap4	1.3904	up	0.0495664
Unknown gene	n/a	1.38755	up	0.00907306
Unknown gene	n/a	1.38743	up	0.00637649
Microtubule Associated Protein 1 Light Chain 3 Gamma	map1lc3c	1.38519	up	0.0296392
Unknown gene	n/a	1.37902	up	0.0291634
Unknown gene	n/a	1.3627	up	0.0184541
Unknown gene	n/a	1.35913	up	0.0239268
Unknown gene	n/a	1.35866	up	0.0140637
Unknown gene	n/a	1.35709	up	0.0030445
Unknown gene	n/a	1.3544	up	0.00355504
Unknown gene	n/a	1.35166	up	0.00842537
Unknown gene	n/a	1.35068	up	0.0408755
Unknown gene	n/a	1.34402	up	0.00173322
Heparan Sulfate 2-O-Sulfotransferase 1	hs2st1	1.34388	up	0.00483191
SAM And SH3 Domain Containing 3	sash3	1.34176	up	0.0474135
Unknown gene	n/a	1.33745	up	0.00831479
StAR Related Lipid Transfer Domain Containing 13	stard13	1.33522	up	0.00748341
Unknown gene	n/a	1.33459	up	0.0182343
Unknown gene	n/a	1.32997	up	0.0220623
Unknown gene	n/a	1.32857	up	0.0212426
Cytoplasmic Linker Associated Protein 1	clasp1	1.32763	up	0.0314409
Unknown gene	n/a	1.3264	up	0.0170181
Unknown gene	n/a	1.32411	up	0.00392786
TSC22 Domain Family Member 2	tsc22d2	1.32368	up	0.0012058
Unknown gene	n/a	1.32089	up	0.0359477
Unknown gene	n/a	1.319	up	0.042624
Rab Interacting Lysosomal Protein	rilp	1.31721	up	0.00175995
Plasmalemma Vesicle Associated Protein	plvap	1.314	up	0.0239104
Unknown gene	n/a	1.3122	up	0.0118227
Unknown gene	n/a	1.31181	up	0.039351
Unknown gene	n/a	1.31038	up	0.0425306
Unknown gene	n/a	1.30769	up	0.029498
Unknown gene	n/a	1.30656	up	0.017805
Methyltransferase Like 18	mettl18	1.3064	up	0.00182582
Unknown gene	n/a	1.30497	up	0.00932255
Unknown gene	n/a	1.29964	up	0.0241839
Unknown gene	n/a	1.29908	up	0.0037145
Unknown gene	n/a	1.29862	up	0.00834758
Unknown gene	n/a	1.2969	up	0.00810501
Unknown gene	n/a	1.29676	up	0.00107797
Unknown gene	n/a	1.29669	up	0.00487173
Unknown gene	n/a	1.29546	up	0.00609321
Unknown gene	n/a	1.29516	up	0.00226437
Unknown gene	n/a	1.29506	up	0.0127241
Unknown gene	n/a	1.29292	up	0.0231544
Unknown gene	n/a	1.29214	up	0.00655564
Unknown gene	n/a	1.29004	up	0.00220382
MAF BZIP Transcription Factor B	mafb	1.28809	up	0.00417898
Gonadotropin Releasing Hormone 2	gnrh2	1.28787	up	0.0162286
Unknown gene	n/a	1.28671	up	0.00702574
Unknown gene	n/a	1.28666	up	0.0225947
Unknown gene	n/a	1.28602	up	0.0082792
Unknown gene	n/a	1.2846	up	0.0292892
Unknown gene	n/a	1.28313	up	0.0393618
Unknown gene	n/a	1.28227	up	0.00057912
Unknown gene	n/a	1.28189	up	0.00469817
Unknown gene	n/a	1.28148	up	0.00547349
Unknown gene	n/a	1.27977	up	0.00551886
Unknown gene	n/a	1.27843	up	0.00462297
Unknown gene	n/a	1.27743	up	0.0444653
Unknown gene	n/a	1.2767	up	0.00108348
Hemoglobin Subunit Alpha 1	hba1	1.27648	up	0.0420859
Unknown gene	n/a	1.27644	up	0.000454481
Unknown gene	n/a	1.27625	up	0.0168009
Aldehyde Dehydrogenase 3 Family Member A2	aldh3a2	1.27547	up	0.0294198
Unknown gene	n/a	1.27424	up	0.00567378
Unknown gene	n/a	1.27377	up	0.023392
Unknown gene	n/a	1.27275	up	0.00377823
Unknown gene	n/a	1.27256	up	0.000487333
EH-domain containing 3	ehd3	1.27132	up	0.0474607
Unknown gene	n/a	1.27039	up	0.0320021
Unknown gene	n/a	1.27023	up	0.0325633
Unknown gene	n/a	1.26974	up	0.0254675
Unknown gene	n/a	1.2681	up	0.0267579
Unknown gene	n/a	1.26791	up	0.00894522
Unknown gene	n/a	1.2676	up	0.0252061
Unknown gene	n/a	1.26712	up	0.0422017
Unknown gene	n/a	1.26688	up	0.012237
Unknown gene	n/a	1.26687	up	0.00667565
Unknown gene	n/a	1.26655	up	0.0188954
TNFAIP3 Interacting Protein 2	tnip2	1.26454	up	0.0294925
Unknown gene	n/a	1.26364	up	0.0187393
Unknown gene	n/a	1.26255	up	0.00352098
Unknown gene	n/a	1.26175	up	0.0339615
Transforming Acidic Coiled-Coil Containing Protein 3	tacc3	1.26167	up	0.0453857
Unknown gene	n/a	1.26021	up	0.0218408
Unknown gene	n/a	1.26	up	0.0276462
Unknown gene	n/a	1.25791	up	0.00484876
Unknown gene	n/a	1.25407	up	0.0223458
Unknown gene	n/a	1.25339	up	0.0064241
Unknown gene	n/a	1.25305	up	0.00891996
Unknown gene	n/a	1.25281	up	0.00986121
Unknown gene	n/a	1.25255	up	0.0313247
Unknown gene	n/a	1.25117	up	0.00498082
Unknown gene	n/a	1.25072	up	0.00544943
Unknown gene	n/a	1.24931	up	0.0258268
Unknown gene	n/a	1.24783	up	0.00435043
Unknown gene	n/a	1.24679	up	0.000236508
Chromosome 2 Open Reading Frame 16	c2orf16	1.24665	up	0.0218613
Unknown gene	n/a	1.24482	up	0.0122534
Bromodomain Containing 4	brd4	1.24458	up	0.01545
Unknown gene	n/a	1.24444	up	0.0270665
Protein Tyrosine Phosphatase, Receptor Type B	ptprb	1.24429	up	0.0187123
Unknown gene	n/a	1.24344	up	0.0108615
Unknown gene	n/a	1.24327	up	0.0148384
Unknown gene	n/a	1.24249	up	0.0229738
Unknown gene	n/a	1.24228	up	0.027465
Unknown gene	n/a	1.24215	up	0.003858
Enhancer Of Polycomb Homolog 1	epc1	1.24002	up	0.00871013
Unknown gene	n/a	1.23937	up	0.00158439
Unknown gene	n/a	1.2393	up	0.00071778
Unknown gene	n/a	1.23469	up	0.00714692
Unknown gene	n/a	1.23234	up	0.00185447
Unknown gene	n/a	1.23095	up	0.0488198
Eukaryotic Translation Elongation Factor 1 Beta 2	eef1b2	1.23084	up	0.0318831
Unknown gene	n/a	1.23067	up	0.0171708
Unknown gene	n/a	1.23	up	0.0438504
Unknown gene	n/a	1.22931	up	0.00173017
Unknown gene	n/a	1.22677	up	0.00183049
Unknown gene	n/a	1.22665	up	0.00669531
Unknown gene	n/a	1.22619	up	0.0102765
Interferon Related Developmental Regulator 1	ifrd1	1.22556	up	0.00435447
Unknown gene	n/a	1.22421	up	0.0169847
MAPK Regulated Corepressor Interacting Protein 2	fam195a	1.22353	up	0.0241331
Small inducible cytokine subfamily E member 1	aimp1	1.22331	up	0.00103523
Unknown gene	n/a	1.22317	up	0.0271532
Src Homology 2 Domain Containing Transforming Protein D	shd	1.22192	up	0.00985907
Unknown gene	n/a	1.22192	up	0.0241061
Ras Related GTP Binding C	rragc	1.22177	up	0.0174494
Unknown gene	n/a	1.22117	up	0.00909642
Unknown gene	n/a	1.22114	up	0.010549
Unknown gene	n/a	1.22067	up	0.0169241
Matrix AAA Peptidase Interacting Protein 1	c2orf47	1.2199	up	0.00844833
Unknown gene	n/a	1.21964	up	0.00656212
Unknown gene	n/a	1.21804	up	0.00491204
Unknown gene	n/a	1.21765	up	0.024331
HRas Proto-Oncogene, GTPase	hras	1.2173	up	8.34092e-07
Unknown gene	n/a	1.21719	up	0.0100489
NLR Family CARD Domain Containing 3	nlrc3	1.21689	up	0.0258263
Syntrophin Alpha 1	snta1	1.2164	up	0.004705
Unknown gene	n/a	1.21639	up	0.00696846
Unknown gene	n/a	1.2159	up	0.0212938
Unknown gene	n/a	1.2156	up	0.00520436
FXYD Domain Containing Ion Transport Regulator 5	fxyd5	1.21476	up	0.0157507
Unknown gene	n/a	1.21465	up	0.0221174
ZFP36 Ring Finger Protein Like 2	zfp36l2	1.2142	up	0.00952105
Unknown gene	n/a	1.21418	up	0.00664477
SMAD Specific E3 Ubiquitin Protein Ligase 2	smurf2	1.21417	up	0.0221764
Unknown gene	n/a	1.21405	up	0.0132453
Unknown gene	n/a	1.21359	up	0.0179155
Unknown gene	n/a	1.21314	up	0.0263765
Unknown gene	n/a	1.21288	up	0.0151134
Unknown gene	n/a	1.21272	up	0.00637186
FYN Binding Protein 1	fyb	1.21214	up	0.00193475
Unknown gene	n/a	1.21087	up	0.000223288
Ectopic P-Granules Autophagy Protein 5 Homolog	epg5	1.20834	up	0.0427027
Unknown gene	n/a	1.20826	up	0.0104288
Unknown gene	n/a	1.20811	up	0.035923
Unknown gene	n/a	1.20739	up	0.036559
Unknown gene	n/a	1.20719	up	0.0397334
Unknown gene	n/a	1.20701	up	0.0431495
Unknown gene	n/a	1.2063	up	0.00140345
Unknown gene	n/a	1.20584	up	0.0255558
Unknown gene	n/a	1.20502	up	0.0162309
Unknown gene	n/a	1.20385	up	0.00728032
Unknown gene	n/a	1.20183	up	0.0340566
Unknown gene	n/a	1.20159	up	0.00229131
Unknown gene	n/a	1.20018	up	0.0174778
Unknown gene	n/a	1.19925	up	0.00130927
Unknown gene	n/a	1.1983	up	0.0249639
Unknown gene	n/a	1.19824	up	0.0173796
Sphingomyelin Phosphodiesterase 1	smpd1	1.19559	up	0.0114936
TNF Alpha Induced Protein 2	tnfaip2	1.19527	up	0.020578
Unknown gene	n/a	1.19523	up	0.019689
Unknown gene	n/a	1.19402	up	0.026902
Inositol Monophosphatase 1	impa1	1.19391	up	0.045666
High Mobility Group Box 2	hmgb2	1.19328	up	0.0007291
Unknown gene	n/a	1.19257	up	0.0432949
Unknown gene	n/a	1.19226	up	0.00268723
Succinate Dehydrogenase Complex Iron Sulfur Subunit B	sdhb	1.19226	up	0.0125699
Unknown gene	n/a	1.19212	up	0.0107871
Interleukin 1 Beta	il1b	1.19186	up	0.0186361
RB Binding Protein 6, Ubiquitin Ligase	rbbp6	1.19108	up	0.0353826
Unknown gene	n/a	1.19108	up	0.0395015
Unknown gene	n/a	1.19105	up	0.00444354
Unknown gene	n/a	1.19035	up	0.0342477
ATP Synthase Peripheral Stalk Subunit F6	atp5j	1.18973	up	0.0156631
WW Domain Binding Protein 4	wbp4	1.18786	up	0.0261978
Unknown gene	n/a	1.1868	up	0.0493944
Ankyrin Repeat And KH Domain Containing 1	ankhd1	1.18658	up	0.0233089
Kelch Domain Containing 4	klhdc4	1.1848	up	0.0292808
Unknown gene	n/a	1.18306	up	0.0172616
ADP Ribosylation Factor Like GTPase 4A	arl4a	1.18288	up	0.0342396
O-Sialoglycoprotein Endopeptidase Like 1	osgepl1	1.18189	up	0.00150711
RAS Guanyl Releasing Protein 2	rasgrp2	1.18147	up	0.0302053
Unknown gene	n/a	1.1811	up	0.00541718
Unknown gene	n/a	1.18092	up	0.0145435
Unknown gene	n/a	1.17981	up	0.0183799
RUNX Family Transcription Factor 3	runx3	1.17966	up	0.00226308
Myosin Heavy Chain 9	myh9	1.1793	up	0.00482745
Unknown gene	n/a	1.1789	up	0.0226222
Unknown gene	n/a	1.17856	up	0.04054
Unknown gene	n/a	1.1784	up	0.0135783
Unknown gene	n/a	1.17778	up	0.00160875
Unknown gene	n/a	1.17771	up	0.0145012
Unknown gene	n/a	1.17664	up	0.00324321
Unknown gene	n/a	1.17598	up	0.0376937
Unknown gene	n/a	1.17575	up	0.0188988
Unknown gene	n/a	1.17495	up	0.0144496
Family With Sequence Similarity 49 Member B	fam49b	1.17474	up	0.00792978
BTB Domain Containing 6	btbd6	1.17447	up	0.00933354
Unknown gene	n/a	1.17424	up	0.0461405
Unknown gene	n/a	1.17388	up	0.0364371
Unknown gene	n/a	1.17347	up	0.0442226
Unknown gene	n/a	1.17308	up	0.045368
Unknown gene	n/a	1.17296	up	0.0401785
Tripartite Motif Containing 8	trim8	1.17278	up	0.00616779
Unknown gene	n/a	1.1721	up	0.00359648
Unknown gene	n/a	1.17156	up	0.0307749
RTF1 Homolog, Paf1/RNA Polymerase II Complex Component	rtf1	1.17149	up	0.0379286
Unknown gene	n/a	1.17138	up	0.000146431
Unknown gene	n/a	1.17129	up	0.0344127
Unknown gene	n/a	1.1709	up	0.00335956
Unknown gene	n/a	1.1703	up	0.01761
Unknown gene	n/a	1.17021	up	0.00448783
Unknown gene	n/a	1.16999	up	0.02996
RAB11 Family Interacting Protein 1	rab11fip1	1.1698	up	0.0202453
Unknown gene	n/a	1.16933	up	0.0395794
Unknown gene	n/a	1.16777	up	0.0202289
Unknown gene	n/a	1.16674	up	0.0340181
Unknown gene	n/a	1.16661	up	0.0192419
Unknown gene	n/a	1.16607	up	0.00572997
Unknown gene	n/a	1.16477	up	0.0348621
Unknown gene	n/a	1.16458	up	0.00579368
Unknown gene	n/a	1.16431	up	0.0227051
Ubiquitin Conjugating Enzyme E2 G1	ube2g1	1.16226	up	0.0338152
Unknown gene	n/a	1.16202	up	0.0166032
Unknown gene	n/a	1.16128	up	0.00876927
Unknown gene	n/a	1.15994	up	0.0432252
Sodium channel modifier 1	scnm1	1.15957	up	0.026368
T-Complex 11 Like 2	tcp11l2	1.15948	up	0.014842
Unknown gene	n/a	1.15869	up	0.0134305
Unknown gene	n/a	1.15756	up	0.0352684
Unknown gene	n/a	1.15671	up	0.0264033
Unknown gene	n/a	1.15618	up	0.00795463
Unknown gene	n/a	1.15613	up	0.0131623
ABR, RhoGEF And GTPase Activating Protein	abr	1.15349	up	0.0124092
G Protein-Coupled Receptor 107	gpr107	1.15277	up	0.0419352
G Protein Subunit Beta 1	gnb1	1.15275	up	0.0408971
H3 Histone Family Member 3A	h3f3a	1.15139	up	0.0181616
Unknown gene	n/a	1.15138	up	0.0357
Unknown gene	n/a	1.15123	up	0.0139232
Unknown gene	n/a	1.15048	up	0.0032337
Unknown gene	n/a	1.15036	up	0.00116995
Unknown gene	n/a	1.15021	up	0.0165069
Upstream Transcription Factor 2, C-Fos Interacting	usf2	1.14927	up	0.0307398
Unknown gene	n/a	1.14925	up	0.0111401
Unknown gene	n/a	1.14845	up	0.000271809
Unknown gene	n/a	1.14766	up	0.0307859
Unknown gene	n/a	1.14732	up	0.0409188
Unknown gene	n/a	1.14702	up	0.0136019
Unknown gene	n/a	1.14677	up	0.0409181
Unknown gene	n/a	1.14651	up	0.036467
Unknown gene	n/a	1.14614	up	0.0117015
Plakophilin 3	pkp3	1.14599	up	0.00837609
Inhibitor Of DNA Binding 2	id2	1.14562	up	0.00422447
Unknown gene	n/a	1.14557	up	0.0267539
Unknown gene	n/a	1.14534	up	0.0309669
Unknown gene	n/a	1.14525	up	0.0221505
Tetratricopeptide Repeat Domain 9C	ttc9c	1.14461	up	0.0382008
Serine And Arginine Rich Splicing Factor 7	srsf7	1.14427	up	0.010678
Unknown gene	n/a	1.14339	up	0.0101558
Metabolism Of Cobalamin Associated D	mmadhc	1.14249	up	0.0360848
Unknown gene	n/a	1.14248	up	0.0030412
Unknown gene	n/a	1.14165	up	0.0302861
RNA Terminal Phosphate Cyclase Like 1	rcl1	1.14076	up	0.0436457
Unknown gene	n/a	1.13976	up	0.0260147
Unknown gene	n/a	1.13865	up	0.0108258
Unknown gene	n/a	1.13863	up	0.00440219
Unknown gene	n/a	1.13854	up	0.0409093
Calponin 2	cnn2	1.13789	up	0.0496691
Phosphatidylserine Decarboxylase	pisd	1.13743	up	0.0263678
Presequence Translocase Associated Motor 16	pam16	1.13734	up	0.00990305
Unknown gene	n/a	1.13706	up	0.0207888
Lysine Demethylase 6A	kdm6a	1.13688	up	0.0330805
Negative Regulator Of Reactive Oxygen Species	nrros	1.13634	up	0.0424922
Unknown gene	n/a	1.13606	up	0.00562562
RIO Kinase 1	riok1	1.13585	up	0.0312905
Tropomyosin 4	tpm4	1.13432	up	0.00809608
Family With Sequence Similarity 213 Member B	fam213b	1.13321	up	0.0197494
Solute Carrier Family 10 Member 3	slc10a3	1.13291	up	0.0428234
Inositol-Trisphosphate 3-Kinase C	itpkc	1.13218	up	0.042821
Unknown gene	n/a	1.13105	up	0.000218994
Unknown gene	n/a	1.13098	up	0.0352492
Unknown gene	n/a	1.13073	up	0.0283071
Unknown gene	n/a	1.1303	up	0.0312518
Unknown gene	n/a	1.12964	up	0.0149738
Unknown gene	n/a	1.12921	up	0.00611217
Progesterone Receptor Membrane Component 2	pgrmc2	1.12863	up	0.0277869
Unknown gene	n/a	1.12687	up	0.008618
Unknown gene	n/a	1.12584	up	0.00246277
Unknown gene	n/a	1.12469	up	0.00741519
Unknown gene	n/a	1.12389	up	0.0281521
Unknown gene	n/a	1.12388	up	0.0215706
Unknown gene	n/a	1.12363	up	0.00378961
BEN Domain Containing 3	bend3	1.12274	up	0.0105685
Unknown gene	n/a	1.12185	up	0.00145135
G Protein Nucleolar 2	gnl2	1.12123	up	0.0175913
Unknown gene	n/a	1.12047	up	0.00883169
Unknown gene	n/a	1.1195	up	0.0293981
Unknown gene	n/a	1.11898	up	0.0296027
Complement Factor H	cfh	1.11883	up	0.02937
Unknown gene	n/a	1.11844	up	0.0105659
Unknown gene	n/a	1.11774	up	0.0432277
Unknown gene	n/a	1.11704	up	0.0370341
Nuclear Factor, Erythroid 2 Like 2	nfe2l2	1.11631	up	0.0203972
Unknown gene	n/a	1.11606	up	0.0103479
Unknown gene	n/a	1.11571	up	0.0215411
Unknown gene	n/a	1.1138	up	0.00573945
Gse1 Coiled-Coil Protein	gse1	1.11323	up	0.00121553
Unknown gene	n/a	1.11258	up	0.0271457
Unknown gene	n/a	1.11208	up	0.039478
RNA, 28S Ribosomal 1	rrp1	1.11186	up	0.0327172
Unknown gene	n/a	1.11048	up	0.044707
Syntaxin 5	stx5	1.10881	up	0.0116838
Teashirt Zinc Finger Homeobox 3	tshz3	1.10813	up	0.0242846
Unknown gene	n/a	1.10772	up	0.0083204
Unknown gene	n/a	1.10729	up	0.0360815
Unknown gene	n/a	1.10713	up	0.0302952
Unknown gene	n/a	1.1054	up	0.0471924
Calpain 1	capn1	1.10501	up	0.0392711
Unknown gene	n/a	1.10477	up	0.0345317
RNA, 18S Ribosomal 1	rna18s1	1.10457	up	0.0370379
Unknown gene	n/a	1.10439	up	0.0353573
Unknown gene	n/a	1.10244	up	0.0316761
Unknown gene	n/a	1.10157	up	0.0145311
Unknown gene	n/a	1.10115	up	0.0433918
Glutathione S-Transferase Kappa 1	gstk1	1.09729	up	0.0357096
Unknown gene	n/a	1.09687	up	0.0369192
Unknown gene	n/a	1.09679	up	0.0267068
Unknown gene	n/a	1.09271	up	0.0401038
Chromobox 8	cbx8	1.09241	up	0.0138273
Pentatricopeptide Repeat Domain 2	ptcd2	1.09125	up	0.0107564
NOP56 Ribonucleoprotein	nop56	1.0912	up	0.0198625
N-Acetyltransferase 1	nat1	1.09089	up	0.0358224
Unknown gene	n/a	1.08965	up	0.0188371
Unknown gene	n/a	1.08804	up	0.0477417
Unknown gene	n/a	1.08649	up	0.00913345
Unknown gene	n/a	1.08608	up	0.0312697
Unknown gene	n/a	1.0851	up	0.0282831
Utrophin	utrn	1.08374	up	0.0251696
Unknown gene	n/a	1.08201	up	0.0366356
Unknown gene	n/a	1.08138	up	0.045153
Unknown gene	n/a	1.07957	up	0.0246175
Phosphate Cytidylyltransferase 2, Ethanolamine	pcyt2	1.07939	up	0.00304697
Unknown gene	n/a	1.07892	up	0.0115387
Huntingtin	htt	1.0776	up	0.0138744
Unknown gene	n/a	1.07709	up	0.0464188
KRAS Proto-Oncogene, GTPase	kras	1.07676	up	0.0490549
Unknown gene	n/a	1.07459	up	0.0374806
Unknown gene	n/a	1.07314	up	0.0316769
Unknown gene	n/a	1.07308	up	0.0292845
Unknown gene	n/a	1.07162	up	0.0425453
Unknown gene	n/a	1.07057	up	0.0348325
Unknown gene	n/a	1.06605	up	0.048552
Importin 7	ipo7	1.06583	up	0.00315241
Unknown gene	n/a	1.06447	up	0.0295647
Caseinolytic Mitochondrial Matrix Peptidase Chaperone Subunit	clpx	1.06416	up	0.0140055
Cathepsin A	ctsa	1.06051	up	0.0489938
Unknown gene	n/a	1.05924	up	0.0498284
Unknown gene	n/a	1.05885	up	0.0245895
Unknown gene	n/a	1.05546	up	0.0351174
NSA2, Ribosome Biogenesis Homolog	nsa2	1.05427	up	0.0326781
Unknown gene	n/a	1.05358	up	0.0251889
Actin Beta	actb	1.04765	up	0.0357114
Unknown gene	n/a	1.04709	up	0.0497939
Unknown gene	n/a	1.04348	up	0.00917545
Gonadotropin Releasing Hormone 1	gnrh1	1.03964	up	0.011813
Unknown gene	n/a	1.02385	up	0.0270935
Unknown gene	n/a	1.01732	up	0.00686967
Zinc Finger DHHC-Type Containing 4	zdhhc4	-1.05074	down	0.0224842
Unknown gene	n/a	-1.05701	down	0.0384456
Unknown gene	n/a	-1.06078	down	0.0457749
Unknown gene	n/a	-1.061	down	0.0412475
Unknown gene	n/a	-1.06362	down	0.0117371
Splicing Factor 3b Subunit 6	sf3b6	-1.06522	down	0.0481058
Phosphoglucomutase 3	pgm3	-1.0653	down	0.0301885
SURP And G-Patch Domain Containing 1	sugp1	-1.06649	down	0.0496544
Exosome Component 2	exosc2	-1.06988	down	0.0416841
Zinc Finger Protein 576	znf576	-1.06993	down	0.0423635
ATPase H+ Transporting V1 Subunit C1	atp6v1c1	-1.07168	down	0.00169394
Peptidylprolyl Cis/Trans Isomerase, NIMA-Interacting 1	pin1	-1.07289	down	0.000607779
Par-6 Family Cell Polarity Regulator Gamma	pard6g	-1.07376	down	0.0188465
Clathrin Light Chain A	clta	-1.07383	down	0.00112273
Ral Guanine Nucleotide Dissociation Stimulator Like 1	rgl1	-1.07394	down	0.0358157
Transmembrane P24 Trafficking Protein 10	tmed10	-1.0763	down	0.0298807
S-Phase Kinase Associated Protein 1	skp1	-1.07689	down	0.0485505
Nucleoporin 54	nup54	-1.07779	down	0.024099
KRAS Proto-Oncogene, GTPase	kras	-1.08105	down	0.0351736
SYF2 Pre-MRNA Splicing Factor	syf2	-1.08189	down	0.0255928
Ribonuclease H2 Subunit B	rnaseh2b	-1.08332	down	0.00223483
Unknown gene	n/a	-1.086	down	0.0355265
Unknown gene	n/a	-1.08696	down	0.008871
Syndecan Binding Protein	sdcbp	-1.08769	down	0.0387769
Serine And Arginine Rich Splicing Factor 10	srsf10	-1.08811	down	0.0411302
Unknown gene	n/a	-1.08937	down	0.0109335
Unknown gene	n/a	-1.08983	down	0.0305707
Protein Disulfide Isomerase Family A Member 3	pdia3	-1.08992	down	0.0125039
Unknown gene	n/a	-1.09438	down	0.0405352
Unknown gene	n/a	-1.09551	down	0.0245472
Oxidative Stress Responsive Kinase 1	oxsr1	-1.0956	down	0.0383872
KxDL Motif Containing 1	kxd1	-1.09597	down	0.0386325
Transmembrane Protein 208	tmem208	-1.09663	down	0.0220215
Unknown gene	n/a	-1.0967	down	0.000375302
Matrin 3	matr3	-1.098	down	0.0153987
Phosphatidylinositol 4-kinase type 2-alpha	pi4k2a	-1.09879	down	0.00062483
Unknown gene	n/a	-1.09908	down	0.0265588
Unknown gene	n/a	-1.09966	down	0.011856
Mitotic Spindle Organizing Protein 1	mzt1	-1.0998	down	0.0146492
Unknown gene	n/a	-1.09991	down	0.00629814
Protein Disulfide Isomerase Family A Member 4	pdia4	-1.10032	down	0.0289084
Unknown gene	n/a	-1.10156	down	0.0434647
Unknown gene	n/a	-1.10206	down	0.0277507
Iron-responsive element-binding protein 2	ireb2	-1.10242	down	0.0152901
Unknown gene	n/a	-1.10247	down	0.0140096
Heat Shock Protein Family A (Hsp70) Member 14	hspa14	-1.10251	down	0.0144899
Ninjurin 1	ninj1	-1.10253	down	0.00842226
Unknown gene	n/a	-1.10542	down	0.000100712
Proliferation-Associated 2G4	pa2g4	-1.10626	down	0.00328953
Signal Recognition Particle 9	srp9	-1.10659	down	0.021271
Unknown gene	n/a	-1.10911	down	0.0266478
DEAD-Box Helicase 1	ddx1	-1.11013	down	0.0301636
LLP Homolog, Long-Term Synaptic Facilitation Factor	llph	-1.11015	down	0.0314723
Unknown gene	n/a	-1.11158	down	0.0109859
DnaJ Heat Shock Protein Family (Hsp40) Member C8	dnajc8	-1.11384	down	0.00242493
TRNA Selenocysteine 1 Associated Protein 1	trnau1ap	-1.1156	down	0.00250294
HAUS Augmin Like Complex Subunit 1	haus1	-1.11597	down	0.0222283
Serine/Threonine Kinase Receptor Associated Protein	strap	-1.11657	down	0.0325534
Membrane Magnesium Transporter 1	mmgt1	-1.11676	down	0.0089281
Electron Transfer Flavoprotein Regulatory Factor 1	lyrm5	-1.11721	down	0.016637
TSR2, Ribosome Maturation Factor	tsr2	-1.11992	down	0.00128387
Pseudouridine 5'-Phosphatase	hdhd1	-1.12018	down	0.0346203
Eukaryotic Translation Initiation Factor 5A	eif5a	-1.121	down	0.0386764
Unknown gene	n/a	-1.1219	down	0.0173427
IlvB Acetolactate Synthase Like	ilvbl	-1.12246	down	0.000811168
Translin Associated Factor X	tsnax	-1.1257	down	0.0221902
Unknown gene	n/a	-1.12628	down	0.0256507
HECT And RLD Domain Containing E3 Ubiquitin Protein Ligase 4	herc4	-1.12799	down	0.000662551
Microtubule Associated Protein 1 Light Chain 3 Beta	map1lc3b	-1.12873	down	0.011534
Unknown gene	n/a	-1.12878	down	0.0448257
Unknown gene	n/a	-1.13142	down	0.0173227
Unknown gene	n/a	-1.13159	down	0.0251457
ATPase H+ Transporting V1 Subunit B1	atp6v1b1	-1.1322	down	0.0325383
Unknown gene	n/a	-1.13359	down	0.0483837
Solute Carrier Family 25 Member 11	slc25a11	-1.13383	down	0.0384645
Ras Protein Specific Guanine Nucleotide Releasing Factor 1	rasgrf1	-1.13404	down	0.0402407
Poly(U) Binding Splicing Factor 60	puf60	-1.13427	down	0.0360797
Deleted In Primary Ciliary Dyskinesia Homolog (Mouse)	dpcd	-1.13435	down	0.0468782
Unknown gene	n/a	-1.13518	down	0.0466448
Peroxisomal Biogenesis Factor 16	pex16	-1.13669	down	0.000487945
Unknown gene	n/a	-1.13761	down	0.0280926
Unknown gene	n/a	-1.13855	down	0.0373764
Pyrophosphatase (Inorganic) 1	ppa1	-1.13942	down	0.0250868
DEK Proto-Oncogene	dek	-1.13993	down	0.0344795
Vacuolar Protein Sorting 36 Homolog	vps36	-1.14054	down	0.00135574
Unknown gene	n/a	-1.14099	down	0.0157131
RasGEF Domain Family Member 1B ???	rasgef1b	-1.1446	down	0.00367724
TP53RK Binding Protein	tprkb	-1.14686	down	0.0227172
Thymidylate synthase	tyms	-1.14723	down	0.00538194
Unknown gene	n/a	-1.14778	down	0.00919849
Transmembrane Protein 230	tmem230	-1.14864	down	0.021096
Sorbitol Dehydrogenase	sord	-1.15048	down	0.0320686
Unknown gene	n/a	-1.15336	down	0.0491461
Pelota MRNA Surveillance And Ribosome Rescue Factor	pelo	-1.15348	down	0.0259747
Cathepsin L	ctsl	-1.15788	down	0.00743284
ARP6 Actin Related Protein 6 Homolog	actr6	-1.15837	down	0.0450317
KIAA1143	kiaa1143	-1.15971	down	0.0305583
Unknown gene	n/a	-1.16071	down	0.0193399
Inositol-Trisphosphate 3-Kinase C	itpkc	-1.16237	down	0.0436778
Unknown gene	n/a	-1.16474	down	0.0273823
Presenilin Enhancer, Gamma-Secretase Subunit	psenen	-1.16529	down	0.00984003
SEC13 Homolog, Nuclear Pore And COPII Coat Complex Component	sec13	-1.16688	down	0.0375496
Unknown gene	n/a	-1.16701	down	0.040498
Chromosome 9 Open Reading Frame 85	c9orf85	-1.16723	down	0.0060213
Unknown gene	n/a	-1.1694	down	0.0235062
Signal peptidase complex subunit 1	spcs1	-1.16979	down	0.0177593
Checkpoint Kinase 1	chek1	-1.16992	down	0.002363
Unknown gene	n/a	-1.17205	down	0.00416956
Unknown gene	n/a	-1.17224	down	0.000392632
Apurinic/Apyrimidinic Endodeoxyribonuclease 1	apex1	-1.17244	down	0.0290329
Phosphohistidine Phosphatase 1	phpt1	-1.17561	down	0.0248467
Unknown gene	n/a	-1.17655	down	0.0447849
Yip1 domain family, member 6	yipf6	-1.17681	down	0.0386643
Relaxin Family Peptide Receptor 3	rxfp3	-1.17774	down	0.000866932
SSU72 Homolog, RNA Polymerase II CTD Phosphatase	ssu72	-1.18011	down	0.0308346
Unknown gene	n/a	-1.18038	down	0.040259
Microfibril Associated Protein 1	mfap1	-1.18469	down	0.0154915
UBAP1-MVB12-Associated (UMA) Domain Containing 1	rpa3os	-1.18607	down	0.032186
Caspase 3	casp3	-1.18689	down	0.013657
N(Alpha)-Acetyltransferase 50, NatE Catalytic Subunit	naa50	-1.18744	down	0.0361978
Zinc Ribbon Domain Containing 1	znrd1	-1.18824	down	0.0349764
Phosphatidylethanolamine Binding Protein 1	pebp1	-1.18871	down	0.00864968
Four And A Half LIM Domains 1	fhl1	-1.19173	down	0.0352916
Unknown gene	n/a	-1.19557	down	0.0378952
Ubiquitin Conjugating Enzyme E2 A	ube2a	-1.19668	down	0.0434743
Glyoxylate And Hydroxypyruvate Reductase	grhpr	-1.19743	down	0.00720218
Small Nuclear Ribonucleoprotein Polypeptide A'	snrpa1	-1.19993	down	0.0361872
Mitochondrial Ribosomal Protein S23	mrps23	-1.20113	down	0.0210822
Calreticulin	calr	-1.2037	down	0.0137689
DnaJ Heat Shock Protein Family (Hsp40) Member B9	dnajb9	-1.20492	down	0.0105413
Unknown gene	n/a	-1.20561	down	0.0372715
ATPase H+ Transporting Accessory Protein 1	atp6ap1	-1.20632	down	0.0156452
Unknown gene	n/a	-1.20864	down	0.0338574
Unknown gene	n/a	-1.21539	down	0.0111383
Unknown gene	n/a	-1.23318	down	0.00670608
5'-Nucleotidase Domain Containing 2	nt5dc2	-1.26063	down	0.0423376
Unknown gene	n/a	-1.27642	down	0.00850288
Unknown gene	n/a	-1.28002	down	0.0237622
Cryptochrome Circadian Regulator 1	cry1	-1.28336	down	0.0147051
Unknown gene	n/a	-1.34583	down	0.0355233
Unknown gene	n/a	-1.35986	down	0.0382289

## Sheet: Supp. Table 2
Supplementary Table 2 – Summary of the Gene Ontology (GO) terms obtained from the microarray-based enrichment analysis for the skin of juvenile gilthead seabream fed the garlic essential oil, carvacrol and thymol supplemented diet. Table lists the GOs term identificator (GO-term), GO description, the observed and background differentially expressed genes (DEGs) count (database count), false disco…
Biological Process (GO)
GO-term	term description	observed gene count	background gene count	false discovery rate	acronyms detail
GO:0006396	RNA processing	26	825	0.0022	ddx1	dnajc8	exosc2	nop56	nsa2	osgepl1	pa2g4	ptcd2	puf60	rbbp6	rcl1	riok1	rragc	rrp1	scnm1	sf3b6	snrpa1	srsf10	srsf7	ssu72	strap	sugp1	syf2	tprkb	tsr2	wbp4
Cellular Component (GO)
GO-term	term description	observed gene count	background gene count	false discovery rate	acronyms detail
GO:0005829	cytosol	91	4958	6.66e-07	abr	actb	aimp1	arl4a	atp6v1b1	atp6v1c1	brd4	btbd6	calr	capn1	casp3	chek1	clasp1	clpx	clta	ddx1	dnajc8	eef1b2	ehd3	eif5a	exosc2	fam213b	fhl1	fyb	gnb1	grhpr	gstk1	haus1	hba1	hdhd1	herc4	hras	hspa14	htt	id2	il1b	impa1	ipo7	ireb2	itpkc	kras	kxd1	map1lc3b	map1lc3c	mmadhc
GO:0044424	intracellular part	181	13996	6.66e-07	abr	actb	actr6	aimp1	aldh3a2	ankhd1	apex1	arl4a	atp5j	atp6ap1	atp6v1b1	atp6v1c1	bend3	brd4	btbd6	c2orf47	calr	capn1	casp3	cbx8	chek1	clasp1	clpx	clta	cnn2	cry1	ctsa	ctsl	ddx1	dek	dnajb9	dnajc8	eef1b2	ehd3	eif5a	epc1	epg5	exosc2	fam195a	fam213b	fam49b	fhl1	foxf2	fyb	gnb1
GO:0044444	cytoplasmic part	139	9377	6.66e-07	abr	actb	aimp1	aldh3a2	apex1	arl4a	atp5j	atp6ap1	atp6v1b1	atp6v1c1	brd4	btbd6	c2orf47	calr	capn1	casp3	chek1	clasp1	clpx	clta	cnn2	cry1	ctsa	ctsl	ddx1	dek	dnajb9	dnajc8	eef1b2	ehd3	eif5a	exosc2	fam195a	fam213b	fam49b	fhl1	fyb	gnb1	gnrh1	gpr107	grhpr	gstk1	haus1	hba1	hdhd1
GO:0043231	intracellular membrane-bounded organelle	145	10365	7.49e-06	actb	actr6	aimp1	aldh3a2	apex1	arl4a	atp5j	atp6ap1	atp6v1b1	atp6v1c1	bend3	brd4	c2orf47	calr	capn1	casp3	cbx8	chek1	clasp1	clpx	clta	cry1	ctsa	ctsl	ddx1	dek	dnajb9	dnajc8	ehd3	eif5a	epc1	exosc2	fam195a	fam213b	fhl1	foxf2	fyb	gnl2	gnrh1	gpr107	grhpr	gstk1	h3f3a	herc4	mhc-iia
GO:0043227	membrane-bounded organelle	152	11244	1.87e-05	actb	actr6	aimp1	aldh3a2	apex1	arl4a	atp5j	atp6ap1	atp6v1b1	atp6v1c1	bend3	brd4	c2orf47	calr	capn1	casp3	cbx8	chek1	clasp1	clpx	clta	cnn2	cry1	ctsa	ctsl	ddx1	dek	dnajb9	dnajc8	ehd3	eif5a	epc1	exosc2	fam195a	fam213b	fam49b	fhl1	foxf2	fyb	gnb1	gnl2	gnrh1	gpr107	grhpr	gstk1
GO:0044446	intracellular organelle part	128	8882	2.83e-05	actb	aldh3a2	apex1	arl4a	atp5j	atp6ap1	atp6v1b1	atp6v1c1	bend3	brd4	c2orf47	calr	capn1	casp3	cbx8	chek1	clasp1	clpx	clta	cnn2	ctsa	ctsl	ddx1	dek	dnajb9	dnajc8	ehd3	eif5a	epc1	exosc2	fam49b	gnl2	gnrh1	gpr107	grhpr	gstk1	h3f3a	haus1	hba1	herc4	mhc-iia	hmgb2	hras	hs2st1	htt
GO:0032991	protein-containing complex	82	4792	3.43e-05	actb	aimp1	apex1	atp5j	atp6ap1	atp6v1b1	atp6v1c1	btbd6	calr	casp3	cbx8	chek1	clasp1	clpx	clta	ddx1	eef1b2	eif5a	epc1	exosc2	fam195a	foxf2	gnb1	h3f3a	haus1	hba1	mhc-iia	hmgb2	htt	id2	ipo7	kdm6a	kxd1	mafb	map1lc3c	mettl18	mmgt1	mrps23	myh9	mzt1	nfe2l2	nop56	nsa2	nup54	osgepl1
GO:0005737	cytoplasm	150	11238	5.60e-05	abr	actb	actr6	aimp1	aldh3a2	ankhd1	apex1	arl4a	atp5j	atp6ap1	atp6v1b1	atp6v1c1	brd4	btbd6	c2orf47	calr	capn1	casp3	chek1	clasp1	clpx	clta	cnn2	cry1	ctsa	ctsl	ddx1	dek	dnajb9	dnajc8	eef1b2	ehd3	eif5a	epg5	exosc2	fam195a	fam213b	fam49b	fhl1	fyb	gnb1	gnrh1	gpr107	grhpr	gstk1
GO:0044422	organelle part	129	9111	5.60e-05	actb	aldh3a2	apex1	arl4a	atp5j	atp6ap1	atp6v1b1	atp6v1c1	bend3	brd4	c2orf47	calr	capn1	casp3	cbx8	chek1	clasp1	clpx	clta	cnn2	ctsa	ctsl	ddx1	dek	dnajb9	dnajc8	ehd3	eif5a	epc1	exosc2	fam49b	gnb1	gnl2	gnrh1	gpr107	grhpr	gstk1	h3f3a	haus1	hba1	herc4	mhc-iia	hmgb2	hras	hs2st1
GO:0043229	intracellular organelle	158	12193	8.94e-05	actb	actr6	aimp1	aldh3a2	apex1	arl4a	atp5j	atp6ap1	atp6v1b1	atp6v1c1	bend3	brd4	c2orf47	calr	capn1	casp3	cbx8	chek1	clasp1	clpx	clta	cnn2	cry1	ctsa	ctsl	ddx1	dek	dnajb9	dnajc8	ehd3	eif5a	epc1	exosc2	fam195a	fam213b	fam49b	fhl1	foxf2	fyb	gnl2	gnrh1	gpr107	grhpr	gstk1	h3f3a
GO:0043226	organelle	159	12432	0.00020	actb	actr6	aimp1	aldh3a2	apex1	arl4a	atp5j	atp6ap1	atp6v1b1	atp6v1c1	bend3	brd4	c2orf47	calr	capn1	casp3	cbx8	chek1	clasp1	clpx	clta	cnn2	cry1	ctsa	ctsl	ddx1	dek	dnajb9	dnajc8	ehd3	eif5a	epc1	exosc2	fam195a	fam213b	fam49b	fhl1	foxf2	fyb	gnb1	gnl2	gnrh1	gpr107	grhpr	gstk1
GO:0005773	vacuole	21	682	0.00051	atp6v1b1	atp6v1c1	capn1	clta	ctsa	ctsl	mhc-iia	htt	il1b	kxd1	map1lc3b	map1lc3c	pa2g4	rilp	rragc	sdcbp	sec13	smpd1	tmem208	tmem230	vps36
GO:0044428	nuclear part	69	4359	0.0038	actb	apex1	arl4a	bend3	brd4	calr	casp3	cbx8	chek1	clpx	ctsa	ddx1	dek	dnajb9	dnajc8	eif5a	epc1	exosc2	gnl2	gpr107	h3f3a	herc4	hmgb2	htt	ipo7	itpkc	kdm6a	llph	matr3	mrps23	nfe2l2	nop56	nsa2	nup54	pa2g4	pgrmc2	pin1	pkp3	puf60	rbbp6	rcl1	riok1	rnaseh2b	rrp1	rtf1
GO:0005634	nucleus	97	6892	0.0061	actb	actr6	aimp1	apex1	arl4a	bend3	brd4	calr	casp3	cbx8	chek1	clpx	cry1	ctsa	ctsl	ddx1	dek	dnajb9	dnajc8	ehd3	eif5a	epc1	exosc2	fam195a	fhl1	foxf2	fyb	gnl2	gpr107	h3f3a	herc4	hmgb2	hras	htt	id2	ifrd1	ipo7	itpkc	kdm6a	llph	mafb	matr3	mfap1	mrps23	myh9
GO:0031981	nuclear lumen	64	4030	0.0061	actb	apex1	arl4a	bend3	brd4	casp3	cbx8	chek1	clpx	ctsa	ddx1	dek	dnajb9	dnajc8	epc1	exosc2	gnl2	gpr107	h3f3a	herc4	hmgb2	htt	ipo7	itpkc	kdm6a	llph	matr3	nfe2l2	nop56	nsa2	pa2g4	pin1	pkp3	puf60	rbbp6	rcl1	riok1	rnaseh2b	rrp1	rtf1	runx3	scnm1	sdcbp	sdhb	sec13
GO:0044437	vacuolar part	15	474	0.0061	atp6v1b1	atp6v1c1	clta	ctsa	ctsl	mhc-iia	kxd1	map1lc3b	map1lc3c	pa2g4	rilp	rragc	sdcbp	sec13	smpd1
GO:0031090	organelle membrane	55	3337	0.0066	aldh3a2	atp5j	atp6ap1	atp6v1b1	atp6v1c1	c2orf47	calr	clpx	clta	dnajb9	ehd3	eif5a	epc1	gnb1	gnrh1	mhc-iia	hras	hs2st1	htt	kxd1	map1lc3b	map1lc3c	matr3	mmgt1	mrps23	nrros	nup54	pam16	pcyt2	pdia3	pex16	pi4k2a	pisd	psenen	ptprb	rab11fip1	rilp	rnd2	rragc	sdcbp	sdhb	sec13	slc25a11	sord	spcs1
GO:0033180	proton-transporting V-type ATPase, V1 domain	3	9	0.0066	atp6ap1	atp6v1b1	atp6v1c1
GO:0070013	intracellular organelle lumen	77	5162	0.0066	actb	apex1	arl4a	bend3	brd4	c2orf47	calr	capn1	casp3	cbx8	chek1	clpx	cnn2	ctsa	ctsl	ddx1	dek	dnajb9	dnajc8	epc1	exosc2	fam49b	gnl2	gpr107	grhpr	gstk1	h3f3a	hba1	herc4	hmgb2	htt	ipo7	itpkc	kdm6a	llph	matr3	nfe2l2	nop56	nsa2	pa2g4	pam16	pdia3	pdia4	pin1	pkp3
GO:0098805	whole membrane	31	1554	0.0091	aldh3a2	atp6ap1	atp6v1b1	atp6v1c1	calr	casp3	clta	ehd3	eif5a	mhc-iia	kras	kxd1	map1lc3b	map1lc3c	mmgt1	pdia3	pex16	pi4k2a	plvap	ptprb	rab11fip1	rilp	rnd2	rragc	sdcbp	sec13	smurf2	steap4	stx5	tmed10	vps36
GO:1990904	ribonucleoprotein complex	19	770	0.0118	actb	apex1	calr	ddx1	fam195a	hba1	map1lc3c	mrps23	nop56	nsa2	pkp3	riok1	rrp1	sf3b6	snrpa1	srp9	sugp1	syf2	wbp4
GO:0005654	nucleoplasm	55	3446	0.0122	actb	apex1	arl4a	bend3	brd4	casp3	cbx8	chek1	clpx	ctsa	ddx1	dek	dnajc8	epc1	exosc2	gpr107	h3f3a	hmgb2	htt	ipo7	itpkc	kdm6a	nfe2l2	nop56	pin1	pkp3	puf60	rbbp6	rcl1	riok1	rnaseh2b	rtf1	runx3	scnm1	sdcbp	sdhb	sec13	sf3b6	skp1	smurf2	snrpa1	srsf10	srsf7	ssu72	strap
GO:0098796	membrane protein complex	23	1047	0.0138	atp5j	atp6ap1	atp6v1b1	atp6v1c1	calr	casp3	clta	gnb1	mhc-iia	mmgt1	pam16	psenen	rragc	sdcbp	sdhb	sec13	snta1	spcs1	srp9	stx5	tmed10	utrn	vps36
GO:0031410	cytoplasmic vesicle	39	2226	0.0165	atp6ap1	atp6v1b1	atp6v1c1	calr	capn1	clta	cnn2	ctsa	ctsl	ehd3	fam49b	gnrh1	gpr107	hba1	mhc-iia	htt	il1b	map1lc3b	map1lc3c	mmgt1	pa2g4	pdia3	pdia4	pi4k2a	ptprb	rab11fip1	rasgef1b	rilp	rnd2	rragc	sdcbp	sec13	smpd1	steap4	stx5	tmed10	tmem230	vps36	yipf6
GO:0031982	vesicle	40	2318	0.0174	atp6ap1	atp6v1b1	atp6v1c1	calr	capn1	clta	cnn2	ctsa	ctsl	ehd3	fam49b	gnrh1	gpr107	hba1	mhc-iia	htt	il1b	map1lc3b	map1lc3c	mmgt1	pa2g4	pdia3	pdia4	pi4k2a	ptprb	rab11fip1	rasgef1b	rilp	rnd2	rragc	sdcbp	sec13	smpd1	sord	steap4	stx5	tmed10	tmem230	vps36	yipf6
GO:0044433	cytoplasmic vesicle part	28	1447	0.0209	atp6ap1	atp6v1b1	calr	capn1	clta	cnn2	ctsa	ctsl	ehd3	fam49b	hba1	mhc-iia	htt	mmgt1	pa2g4	pdia3	pi4k2a	ptprb	rab11fip1	rilp	rnd2	rragc	sdcbp	sec13	steap4	stx5	tmed10	vps36
GO:0030134	COPII-coated ER to Golgi transport vesicle	5	75	0.0239	mhc-iia	sec13	stx5	tmed10	yipf6
GO:0005798	Golgi-associated vesicle	7	155	0.0240	clta	gnrh1	mhc-iia	sec13	stx5	tmed10	yipf6
GO:0005730	nucleolus	20	926	0.0291	apex1	arl4a	bend3	ddx1	dnajb9	exosc2	gnl2	herc4	hmgb2	llph	nop56	nsa2	pa2g4	rbbp6	rcl1	rrp1	rtf1	runx3	tyms	znrd1
GO:0005774	vacuolar membrane	10	311	0.0291	atp6v1b1	atp6v1c1	clta	mhc-iia	kxd1	map1lc3b	map1lc3c	rilp	rragc	sec13
GO:0016469	proton-transporting two-sector ATPase complex	4	49	0.0324	atp5j	atp6ap1	atp6v1b1	atp6v1c1
GO:0005768	endosome	19	876	0.0332	atp6ap1	clta	ctsl	ehd3	gpr107	mhc-iia	htt	mmgt1	pdia3	pi4k2a	rab11fip1	rasgef1b	rilp	rnd2	rragc	smpd1	steap4	tmem230	vps36
GO:0000408	EKC/KEOPS complex	2	6	0.0405	osgepl1	tprkb
GO:0044464	cell part	183	16244	0.0405	abr	actb	actr6	aimp1	aldh3a2	ankhd1	apex1	arl4a	atp5j	atp6ap1	atp6v1b1	atp6v1c1	bend3	brd4	btbd6	c2orf47	calr	capn1	casp3	cbx8	chek1	clasp1	clpx	clta	cnn2	cry1	ctsa	ctsl	ddx1	dek	dnajb9	dnajc8	eef1b2	ehd3	eif5a	epc1	epg5	exosc2	fam195a	fam213b	fam49b	fhl1	foxf2	fxyd5	fyb
GO:0070765	gamma-secretase complex	2	6	0.0405	psenen	tmed10
GO:0005764	lysosome	14	582	0.0435	capn1	clta	ctsa	ctsl	mhc-iia	il1b	kxd1	pa2g4	rilp	rragc	sdcbp	sec13	smpd1	vps36
GO:0012507	ER to Golgi transport vesicle membrane	4	56	0.0435	mhc-iia	sec13	stx5	tmed10
GO:0030658	transport vesicle membrane	7	181	0.0435	atp6v1b1	clta	mhc-iia	pi4k2a	sec13	stx5	tmed10
GO:0012505	endomembrane system	62	4347	0.0447	aimp1	aldh3a2	apex1	atp6ap1	atp6v1b1	calr	capn1	clasp1	clta	cnn2	ctsa	ctsl	dnajb9	ehd3	eif5a	epc1	fam213b	fam49b	gnrh1	gpr107	mhc-iia	hras	hs2st1	htt	il1b	ipo7	map1lc3b	map1lc3c	matr3	mmgt1	mrps23	nfe2l2	nrros	nup54	pa2g4	pcyt2	pdia3	pdia4	pex16	pgrmc2	pi4k2a	psenen	ptprb	rab11fip1	rasgef1b
Molecular Function (GO)
GO-term	term description	observed gene count	background gene count	false discovery rate	acronyms detail
GO:0005515	protein binding	104	6607	0.00016	cry1	myh9	apex1	snta1	usf2	skp1	id2	pex16	clta	gnrh2	phpt1	pin1	dnajb9	plvap	kras	foxf2	sdcbp	ttll7	pebp1	smurf2	cnn2	il1b	itpkc	brd4	dnajc8	clasp1	rasgef1b	llph	sord	map1lc3b	cbx8	tprkb	gnrh1	stx5	hmgb2	clpx	pdia3	rilp	trim8	pa2g4	tmed10	rgl1	abr	mettl18	casp3
GO:0044877	protein-containing complex binding	26	968	0.0034	myh9	apex1	atp6v1b1	clta	kras	il1b	brd4	clasp1	pelo	abi3bp	c2orf47	tmed10	srp9	casp3	calr	eif5a	ecm2	tpm4	ctsl	h3f3a	utrn	pi4k2a	rtf1	fyb	fam49b	gnb1
[truncated: 138 more columns]

## Sheet: Supp. Table 3
Supplementary Table 3 – Summary of the KEGG Pathways obtained from the microarray-based functional enrichment analysis of the skin of juvenile gilthead seabream fed the garlic essential oil, carvacrol and thymol supplemented diet. Table lists the pathways definitions and the corresponding differentially expressed genes (DEGs) count (database count), false discovery rate, and acronyms.
KEGG Pathways
pathway	term description	observed gene count	background gene count	false discovery rate
hsa04141	Protein processing in endoplasmic reticulum	8	161	0.0400	calr	capn1	nfe2l2	pdia3	pdia4	sec13	skp1	ube2g1
hsa04145	Phagosome	8	145	0.0400	actb	atp6ap1	atp6v1b1	atp6v1c1	calr	ctsl	mhc-iia	rilp
hsa05110	Vibrio cholerae infection	5	48	0.0400	actb	atp6ap1	atp6v1b1	atp6v1c1	pdia4

## Sheet: Supp. Table 4
Supplementary Table 4 – Summary of the Gene Ontology (GO) terms of the biological processes obtained from the microarray-based enrichment analysis for the skin of juvenile gilthead seabream fed the garlic essential oil, carvacrol and thymol supplemented diet. Table lists the GOs term identificator (GO-term), GO description, the observed and background differentially expressed genes (DEGs) count (…
Biological Process (GO)
GO-term	term description	observed gene count	background gene count	false discovery rate	acronyms detail
GO:0002376	immune system process	17	2370	1.07e-05	dnajb9	cnn2	il1b	pdia3	casp3	calr	tnip2	nrros	ctsl	actb	nlrc3	cfh	ctsa	mafb	aimp1	hla-a	capn1
GO:0002682	regulation of immune system process	11	1391	0.0029	il1b	casp3	calr	tnip2	actb	nlrc3	h3f3a	cfh	mafb	hla-a	nfe2l2
GO:0006950	response to stress	16	3267	0.0029	dnajb9	il1b	pdia4	pdia3	casp3	calr	tnip2	hba1	nrros	h3f3a	cfh	ddx1	aimp1	hla-a	nfe2l2	ifrd1
GO:0002479	antigen processing and presentation of exogenous peptide antigen via MHC class I, TAP-dependent	3	25	0.0037	pdia3	calr	hla-a
GO:0050896	response to stimulus	24	7824	0.0037	dnajb9	cnn2	il1b	pdia4	pdia3	casp3	calr	tnip2	hba1	nrros	ctsl	actb	nlrc3	h3f3a	cfh	ctsa	ddx1	aimp1	hla-a	nfe2l2	ifrd1	gstk1	capn1	nat1
GO:0034976	response to endoplasmic reticulum stress	5	240	0.0073	dnajb9	pdia4	pdia3	calr	nfe2l2
GO:0002478	antigen processing and presentation of exogenous peptide antigen	4	123	0.008	pdia3	calr	ctsl	hla-a
GO:0006508	proteolysis	9	1203	0.0083	dnajb9	pdia3	casp3	tnip2	ctsl	actb	ctsa	nfe2l2	capn1
GO:0070887	cellular response to chemical stimulus	13	2672	0.0087	dnajb9	cnn2	il1b	casp3	calr	tnip2	hba1	ctsl	actb	hla-a	nfe2l2	gstk1	nat1
GO:0008152	metabolic process	25	9569	0.0118	dnajb9	ireb2	il1b	dnajc8	pdia4	pdia3	casp3	calr	tnip2	hba1	nrros	ctsl	actb	h3f3a	cfh	ctsa	mafb	steap4	ddx1	aimp1	hla-a	nfe2l2	gstk1	capn1	nat1
GO:0045454	cell redox homeostasis	3	68	0.0171	pdia4	pdia3	nfe2l2
GO:0097237	cellular response to toxic substance	4	195	0.0215	hba1	actb	nfe2l2	gstk1
GO:0034248	regulation of cellular amide metabolic process	5	379	0.0236	ireb2	calr	ctsa	ddx1	nfe2l2
GO:0034975	protein folding in endoplasmic reticulum	2	14	0.0236	pdia3	calr
GO:0006457	protein folding	4	214	0.024	pdia4	pdia3	calr	hspa14
GO:0045321	leukocyte activation	7	894	0.024	dnajb9	cnn2	nlrc3	ctsa	mafb	hla-a	capn1
GO:0051707	response to other organism	8	1173	0.024	il1b	casp3	tnip2	nrros	cfh	ddx1	aimp1	hla-a
GO:0065008	regulation of biological quality	14	3559	0.024	ireb2	il1b	pdia4	pdia3	casp3	calr	tnip2	h3f3a	ctsa	mafb	steap4	aimp1	nfe2l2	ifrd1
GO:0002252	immune effector process	7	927	0.0259	cnn2	actb	cfh	ctsa	aimp1	hla-a	capn1
GO:0002683	negative regulation of immune system process	5	425	0.0265	casp3	nlrc3	mafb	hla-a	nfe2l2
GO:0002726	positive regulation of T cell cytokine production	2	19	0.0265	il1b	hla-a
GO:0019538	protein metabolic process	15	4194	0.0265	dnajb9	il1b	pdia3	casp3	calr	tnip2	ctsl	actb	h3f3a	cfh	ctsa	aimp1	hla-a	nfe2l2	capn1
GO:0030968	endoplasmic reticulum unfolded protein response	3	103	0.0265	dnajb9	calr	nfe2l2
GO:0032101	regulation of response to external stimulus	7	955	0.0265	il1b	calr	tnip2	nlrc3	cfh	hla-a	nfe2l2
GO:0042221	response to chemical	15	4153	0.0265	dnajb9	cnn2	il1b	casp3	calr	tnip2	hba1	ctsl	actb	ddx1	aimp1	hla-a	nfe2l2	gstk1	nat1
GO:0098754	detoxification	3	96	0.0265	hba1	nfe2l2	gstk1
GO:1901222	regulation of NIK/NF-kappaB signaling	3	97	0.0265	il1b	calr	nlrc3
GO:0009636	response to toxic substance	5	468	0.0315	casp3	hba1	actb	nfe2l2	gstk1
GO:0042542	response to hydrogen peroxide	3	112	0.0315	casp3	hba1	nfe2l2
GO:0006954	inflammatory response	5	482	0.0329	il1b	tnip2	nrros	aimp1	nfe2l2
GO:0009605	response to external stimulus	10	2152	0.0381	cnn2	il1b	casp3	tnip2	nrros	cfh	ddx1	aimp1	hla-a	nfe2l2
GO:2000352	negative regulation of endothelial cell apoptotic process	2	28	0.0381	tnip2	nfe2l2
GO:0034249	negative regulation of cellular amide metabolic process	3	133	0.0418	ireb2	calr	ctsa
GO:0097192	extrinsic apoptotic signaling pathway in absence of ligand	2	31	0.0418	il1b	casp3
GO:0019725	cellular homeostasis	6	806	0.042	ireb2	pdia4	pdia3	calr	steap4	nfe2l2
GO:0071310	cellular response to organic substance	10	2219	0.042	dnajb9	cnn2	il1b	casp3	calr	tnip2	ctsl	actb	hla-a	nfe2l2
GO:0051716	cellular response to stimulus	18	6212	0.0432	dnajb9	cnn2	il1b	pdia4	pdia3	casp3	calr	tnip2	hba1	ctsl	actb	nlrc3	ddx1	aimp1	hla-a	nfe2l2	gstk1	nat1
GO:0006984	ER-nucleus signaling pathway	2	34	0.0439	calr	nfe2l2
GO:0042592	homeostatic process	8	1491	0.0457	ireb2	il1b	pdia4	pdia3	casp3	calr	steap4	nfe2l2
GO:0042129	regulation of T cell proliferation	3	151	0.0496	il1b	casp3	hla-a
